# Supplementary material
Source: publisher site journal article supplement (https://dez.pensoft.net/article/21000/download/suppl/31/)
Supplement: Supplementary file 1

Supplementary Material S1

The NONA format data file (Goloboff 1999), exported from WinClada (Nixon 2002), that supports the cladistic analysis of Amblytelina and New Caledonian *Mecyclothorax* follows. To replicate the cladistic analysis, copy all file text from "xread" to the end of the file, paste it into Notepad, and save as a file with ".ss" suffix. This can then be imported to WinClada, making certain the Input file dialog box accepts "ALL files." Save the file in WINC format and then it can be opened in Winclada, allowing visualization of all equally parsimonious trees, the consensus cladogram, and all character state optimizations.

xread

''137 65

Neo_laevicollis_EOZ 001120000011000021220000013000000100020010000000001120000020-111011010011201-0000001004333000000000-000-0-0000200000000000000000000120000

Amb_brevis_OZ 022010100202002102103000011000000113042000000010000032020030-00000001002000000120002104331110044032-000-0-01000-0001000000001000210410101

Amb_curtus_EOZ 022110100202002101103000003000000013042000000000000032020030-00000001002000000020001224331110043032-000-0-01000-0001000101001000220410101

Amb_matthewsi_EOZ 0220101002020021011030000010100001101420000001300000[01]0200030-00110000002100000120000104321000042032-000-0-0100300001000000001000210410101

Dys_amplipennis_EOZ 022110100012002102103010-01011000110012200100000000020110130-02211101002000000020003201031000044032-000-0-01000-0001000103001100210410101

Epe_lindensis_OZ 012110100212002102102000111011000110142000000000000132110030-001000010021000000000011032330000211320000-0-00010-00??????????????2?0410101

Par_brevistylus_WOZ 012010110002002002102010-0011111-110142200000000100000000130-01111001-120000000110100243210000110010000-0-00011-0011000000001000210410100

Euc_blackburni_WOZ 001100111001100032[12][12]1000000011200110000200221332000120000030-0220230311102000000102?0133331000330320000-1100013300000000010000001[12]0210000

Euc_curtus_EOZ 101110131001001031[12][01]100000201111-010010201121320001120000030-2110220301102032000002?01333310??????????????????????00000001001000000410010

Euc_n._sp._D_EOZ 012100111001001132[12]1[12]1010-100120012301130022?332000120000010-010014021111203100010100132220010321320000-110001320100000001000000210210000

Euc_peryphoides_EOZ 0211001110010011321[12]10000010[01]121-113001300220332000120000010-01102402111020[03]000010000133321000320220000-110001300010000001001001220210000

Euc_eyrensis_EOZ 02110011100100113[12][12]11[01]00000011110113001300220332000120000010-011024021110200000010000133331000320220000-110001300010000001001001220210000

Euc_lophoides_EOZ 0112001110011011321[12]200001100111-123000300220332000120000010-01102401111020[03]000010100132320000220220000-110001300010000001000000220210000

Euc_moorei_EOZ 01120011100000003111000000201111-1100002022214200111200000020211036120010203200010010133331000430220000-1100010-0000000002000000100311010

Euc_punctatus_EOZ 01220011100000002120100000201111-20000020212142201122000100202100261200112032100100?01333310?????????????????????????????????????????????

Qec_impressipennis_QOZ 00110011101110002111000010000111-01002120020000000101010000202110360110111032000000?01333310????????????????????????????????????100210010

Qec_inflatus_QOZ 01110011101110002[01]11000000200111-0100312002000-01013101000020211036010010103200000000133330000221120000-0-00012400??????????????100210010

Qec_lewisensis_QOZ 00110011101110002111000010000111-110021200200001101210100012021203411002120320000000013333000[01]220220000-0-0001340011000010000000100210010

Qec_storeyi_QOZ 0011001110111000301000011-000111-023010200200[12]1000131010100202120351100102032000000001333300002[23]0320000-0-0001200010000000001000100210010

Meo_amplipennis_NNZ 1111011202110100301210012-011221-0130202000001200010100010120200002111000303200010000133330001111100000-0-0001210002002-0301-210200110000

Meo_bellorum_NNZ 00110012021101002[01]0[12]000110001211-1130202002102200013200000121110021032111203100010000133331201221220000-0-0001200000000000001100110210000

Meo_eplicatus_NNZ 1111011202110100301[12]20011-011221-0130102000001200010100010120200011111000303200010000122320001111100000-0-00010-0001012-0301-210[01]10210000

Meo_rectus_NNZ 111101120211010020[01]210012-011221-0110102000001200112100010120200011132010203100010000143330001111100001-0-0001200001012-0301-210210210010

Meo_spiculatus_NNZ 111101120211010020[01]210012-011221-0120102000001200110100010120200013122010303100010000143330001111100001-0-0001210001012-0301-210210310010

Pha_fleutiauxi_NC 0111011110120000112211011-30000011100300002001200013[12]000[01]0021111054100011013200000000121220000430220102-0-00000-000000--13100010110411000

Pha_jeanneli_sp._n._NC 0111011110120000112211011-30000011100300002001200013[12]00000021111054100011013200000000121220000430220102-0-00001-000000--23100010110411000

Pha_kanak_sp._n.__NC 01110011101200003[01]1001010-100101-010021100200120001020000012021003311000110320000000014233000044032002--1000012020100[01]1-01101100[12]11210000

Pha_laterobustus_sp._n.__NC 010101121012010020101011--000101-0100202001000-0011320-00002021102410-001203210010000112320000340320000-100001200000000001?01000110210000

Pha_laterorectus_sp._n._NC 0111001210120000211100011-000001-1100212002000-00013200000120211003101011203210011000122220000331320000-100001200000000000000000[12]10210000

Pha_laterosinuatus_sp._n._NC 01110012101200002[01][12]100011-000001-1100212002000-00013200000120211003101011203210011000122220001421320000-100001200000000000000000[01]10210000

Pha_laterovatulus_sp._n._NC 0111001210120000202200010-300001-1100212001000-0001320000012021100310102010320001100??21220000430320000-1000013000???????????????????????

Pha_manautei_sp._n._NC 0111001210120000312001010-300101-0100212002001200010200000121211033100011103200000000143320000330220000-101001220010000001101000110210000

Pha_megalovatulus_sp._n._NC 02010012101201002[01]1111011-100001-1000102002001200013[12]00000121100000101011013210010000112220000440320000-100001200101000001101000200210000

Pha_mouensis_sp._n._NC 01110011101200003[01]1001010-100101-010021100200120001020000012021003310000110320000000014233000043032002--101001220010000000101100211210000

Pha_najtae_NC 0101001110120000102011011-100101-000020200200120001220-00012020003400-0010032100000-01212200?????????????????????????????????????????????

Pha_octavius_sp._n._NC 0101001110120000210011011-100111-113030300200130001220000002120005600100121321000100??21210000420220000-1000002100???????????????????????

Pha_paniensis_sp._n._NC 0101001210120000301001010-000101-1100202002001200010200000121211044100011103200000000133320000420320000-100001300010000001101000110210000

Pha_picdupinsensis_sp._n._NC 0111001110120000311001010-100101-010021100200120001020000012021003311000110320000000014233000044032002--100001201010001-01101100[12]11210000

Pha_plurisetosus_sp._n._NC 1211001110120200202211011-100001-1020212001000-00013200000022200056000011013210000000143331001440320102-0-0000210000001-01?????01103[01]1000

Mec_goweri_LH 0022001012110021200200011-000021-11003120020022000103000001210110020110110031000000?012222000122132101-10-0000200001003-03001010[01]10200000

Mec_howei_LH 0111001002010021200200011-000001-11103120010022000103000001210110021311112031000000?012222000122132101-10-0000230001003-0300--10110210000

Mec_monteithi_Nf 2022101111110021200200011-300101-110031000000200001020000012011103312101120310000000??1332000032132101-10-00002200???????????????????????

Mec_amingwiwae_PNG 11110010020100200212100011201221-22301210010013001102000101210110330110113032000101?01221200?????????????????????????????????????????????

Mec_andersoni_PNG 11210011011100001[01]1101010-300[12]21-113021200000130001120001012101102402101120310001010012222001042022101-00-0000210001003-03001000220310010

Mec_andersoni_long_PNG 11210011011100001[01]1101010-300[12]21-113021200000130001120001012101102402101120310001010012222001042022101-00-0000210001003-03001000220310010

Mec_baehri_PNG 01210010020110212121100021000221-123001100000130001130000011-00102301101120310001010??2111000022032101-00-00000000???????????????????????

Mec_brispex_PNG 0111001101110000300100011-000100011300120020023000102000101210110350110112031000101001222200??????????????????????11000001001000110210010

Mec_gressitti_PNG 10210011[01]10100210210100011200121-123021100000130011110001012101102402111020310001010013332001023032101-00-00000-0001003-03001000120311010

Mec_kavanaughi_PNG 20110010020100211012100010100121-223011100100130[01]00131001011-00101203211020310001010013333000032032101-10-00010-0002103-03001000220310010

Mec_medioconstrictus_PNG 11210010020110212110100010000121-12300010000013000113000001210000220210012031000101?01221000????????????????????????????????????22?310000

Mec_sedlaceki_PNG 20210010020010101011000010000221-213011100100130100120001011-0000120111103030000101?013330000022132101-?0-00000-0001003-03001000110310000

Mec_ambiguus_OZ 01110010020010211212200011200221-223002100000232000120000020-01001202001030000000010013311000032132101-10-00100-0001003-03001000220310000

Mec_lateralis_OZ 00210010020110213[12]21200020200121-223012100000132100120000011-0200130210103010000101?013330110031132101-00-00011-0011010103001000210011000

Mec_minutus_OZ 00210010020110113121200020200221-223011100000132100120000010-01001302101020300001011013333110132132001-00-00010-0011010103001000020000000

Mec_punctipennis_OZ 01110010020000211220200010200221-223012100000332000120000020-01001202111030000000010014332000042132101-10-00100-0002003-03001000220310010

Mec_marau_FP 01110010020000211111200010200221-123012100000332000020000021-02200000101130310000010012111000042032101-10-00100-0002003-03001000220310010

Mec_montivagus_HI 111100100200002111[12]1200010200121-123012100000[23]320001[23]0000020-01101202111030210000010014321000042132101-10-00100-0002003-03001000220310010

Mec_sculptopunctatus_SP&A 01110010020010211210200010200221-223012100000332000120000020-01001302111030100000010014321000042132101-10-00100-00???????????????????????

Mec_oopteroides_SNZ 20110010020100212221200010100021-0130212000002220001[23]0000021-02201101101130310000010010001000042132101-10-0000200101103-13001000220310000

Mec_otagoensis_SNZ 20110010020100211210100010000021-123001200000222100120000021-02202202011030310000010012110000042131101-10-0000200101003-03001000220310000

Mec_rotundicollis_NZ 00110010020010211211200011200221-123002100000232000120000020-021012021[01]1030000000010012202000032131101-10-0010230001003-03001000210310000

Mec_basipunctus_Jv 01210010020000211211100011000121-113021100000332000120000011-0210320010103030000100?01332100?????????????????????????????????????????????

Mec_lissus_Jv 00210010020000211110100010100221-123012100000332000120000011-02103302101110210000000013211000032133101-10-00000-0002003-03001001220310000

Mec_rectangulus_Jv 10220010020000211112100011000221-102022100000232000120000011-0210320110113031000000?01212100??????????????????????02003-03001000220310000

Mec_globicollis_Bo 11220010010100211012100010300001-113001100000230000131001011-02202502100000310000000012120000022032??1-10-00000-0001003-03001000220310010

;

cc - 0 7 39 54 75.76 82.87 89 91 96 101 110.111 116 121 126 129;

cc + 1.6 8.38 40.53 55.74 77.81 88 90 92.95 97.100 102.109 112.115 117.120 122.125 127.128 130.136;

proc /;

optcode f 0.136;

#

$

;

cn {0 3rd_antennomere glabrous_except_for_apical_ring_of_setae a_few_short_setae_basad_apical_ring setose_in_apical_half;

{1 Antennomere_9_length/width_ratio 1.46<x<=1.92 2.0<x<2.8 x=>_2.87-3.67;

{2 Labrum_front_margin straight slightly_emarginate distinctly_emarginate;

{3 Mandibular_length_ratio_(re_distance_from_condyle_to_labral_margin) very_short,_ratio_1.18-1.55 moderately_elongate,_ratio_of_1.57-1.92 elongate,_ratio_of_2.0-2.33;

{4 Apical_2_maxillary_palpomeres apparently_glabrous with_short,_sparse_setose_pelage with_long,_setose_pelage;

{5 Anterior_supraorbital_seta present absent;

{6 Frontal_grooves very_shallow,_not_evident_between_eyes shallow_to_deep,_evident_between_eyes;

{7 Frontal_grooves subparallel arcuately_convergent,_then_divergent_anterad very_deep_from_front_of_eye,_large_lateral_callous,_pit_at_f-c_suture shallow,_convergent_from_front_of_eye,_no_pit_at_f-c_suture;

{8 Frontal_grooves not_extended_onto,_or_much_shallower_on_clypeus extended_onto_clypeus;

{9 Neck_impression absent,_dorsum_of_head_convex flat_area_between_hind_margins_of_eye transverse_depression_behind_hind_margins_of_eyes;

{10 Ocular_lobe_assessed_behind_eye_(dorsal_view) protruded,_meeting_gena_at_obtuse_angle little_protruded,_meeting_gena_at_very_obuse_angle;

{11 Ocular_lobe_groove_behind_eye distinct_groove_present shallow_groove_present no_groove_present,_juncture_simple_change_in_angle_of_surfaces;

{12 Mentum_tooth sides_acute_to_subparallel,_apex_tightly_rounded sides_more_obtuse,_apex_broadly_rounded;

{13 Mentum_width/length_ratio 2.4<x<3.1 3.14<x<3.5 3.7<x<4.5;

{14 Apex_of_ligula apically_rounded_or_with_narrow_concave_apex_between_setae broad,_longer_medially_with_shorter_lateral_wings broadly_truncate,_margin_straight_and_heavily_sclerotized;

{15 Apical_ligular_setae_(2) proximate,_separated_by_1-2_setal_diameters distant,_separated_by_3-4_or_more_setal_diameters;

{16 Paraglossae extended_only_slightly_beyond_apex_of_ligula extended_1/2_distance_from_base_to_ligular_apex_beyond_apex extended_as_far_beyond_apex_as_basal_length_to_apex extended_2x_as_far_beyond_apex_as_basal_length_of_apex;

{17 Ocular_ratio 1.31<x<=1.42 1.43<=x<=1.54 1.55<=x<1.75;

{18 Ocular_lobe_ratio 0.59<x<0.72 0.73<x<0.87 0.88<x<0.97;

{19 Eye_convexity_(EyL/EyD) convex_or_popeyed,_2.0<x<2.53 moderately_convex,_2.55<x<2.89 little_convex,_2.90<x<4.18;

{20 Number_of_ommatidia_across_horizontal_diameter_of_eye 11-15 16-20 21-30 31-40;

{21 Pronotum broad_basally,_MPW/BPW_=_1.23-1.80 narrow_basally,_MPW/BPW_=_1.82-3.91;

{22 Pronotal_lateral_seta present absent;

{23 Pronotal_basal_seta present absent;

{24 Lateral_pronotal_setal_position_(if_present)_with articulatory_socket_in_or_adjoining_lateral_marginal_depression articulatory_socket_1/2-2_setal_diameters_from_marginal_depression articulatory_socket_2-4_setal_diameters_from_marginal_depression;

{25 Pronotal_hind_seta_(if_present)_situated at_hind_angle visibly_anterad_hind_angle;

{26 Pronotal_hind_angles nearly_right_to_obtuse,_with_sides_subparallel_anterad_hind_angle obtuse,_sides_divergent_anterad_hind_angle projected_denticle_on_rounded_lateral_margin obsolete,_lateral_and_basal_margins_convex;

{27 Pronotal_hind_angle rounded_to_right-angled acute,_with_acuminate_lateral_projection_at_angle;

{28 Pronotal_basal_margin straight_or_convex_mesad_hind_angles distinctly_sinuate_inside_hind_angles;

{29 Pronotal_median_base coplanar_with_disc_medially depressed_relative_to_disc_medially greatly_depressed_relative_to_disc_medially;

{30 Pronotum_median_base smooth_laterally_mesad_laterobasal_depressions with_3-10_punctures_each_side_mesad_laterobasal_depressions with_>12_punctures_each_side_mesad_laterobasal_depressions;

{31 Pronotal_basal_margin beaded_medially convex_medially,_marginal_bead_only_behind_laterobasal_depression;

{32 Pronotal_basal_marginal_bead_if_present_(state_0,_#31) narrow,_continuous_with_lateral_bead broader,_discontinuous_with_lateral_bead;

{33 Pronotal_median_longitudinal_impression well_defined,_continuous_on_pronotal_disc fine_and_shallow_on_disc reduced_to_small_punctures,_obsolete,_or_obscured_by_punctures;

{34 Anterior_transverse_impression obsolete_to_absent_medially,_anterior_callosity_not_defined broad_and_shallow_medially,_anterior_callosity_broadly_convex broad_and_deep_medially,_anterior_callosity_well_defined_posteriorly;

{35 Anterior_transverse_impression_ absent_to_obsolete_laterally visible_only_in_outer_1/4-1/3_of_breadth_each_side visible_in_outer_1/2_of_breadth_each_side visible_across_entire_breadth_of_notum;

{36 Pronotal_anterior_margin unmargined with_marginal_bead_medially;

{37 Pronotal_front_angles not_protruded,_rounded_behind slightly_protruded,_broadly_rounded slightly_protruded,_narrowly_to_tightly_rounded protruded,_obtusely_rounded_to_angulate protruded,_broadly_rounded;

{38 Pronotal_lateral_marginal_depression_(at_midlength) very_narrow,_margin_beaded moderately_narrrow,_microsculpture_visible_at_depth broad_to_very_broad,_lateral_margin_variously_explanate;

{39 Pronotal_laterobasal_depression broad,_smoothly_extended_to_lateral_margin continuous_linear_broadening_of_lateral_marginal_depression with_median_longitudinal/punctate_depression_and_lateral_tubercle not_depressed,_surface_rugose_or_punctate;

{40 Prosternal_process smooth_ventrally,_rounded_behind margined_ventrally,_a_bead_defining_ventroposterior_margin;

{41 Proepisternum smooth with_large_punctures_ventrally_along_sternum covered_with_large_punctures;

{42 Prosternum medially_convex_anterad_and_between_coxal_cavities medially_depressed_only_between_coxal_cavities medially_depressed_between_and_anterad_coxal_cavities;

{43 Prosternum smooth_medially with_2-4_punctures_medially with_5-7_punctures_medially;

{44 Lateral_portion_of_prosternum impunctate_except_for_anteapical_furrow irregularly_punctate;

{45 Prosternal_anterior_margin without_or_with_very_shallow_indistinct_groove with_smooth_depression_or_groove with_indistinctly_punctate_groove with_distinctly_punctate_groove with_groove_reduced_to_serially_isolated_punctures;

{46 Prosternal_anteapical_groove_(if_present_at_all_in_some_form) very_short,_restricted_to_dorsal_apex_of_prosternum longer,_from_apex_ventrad_onto_lateral_surface_of_prosternum continuous_but_shallower_or_irregular_between_sides_of_prosternum continuously_deep_ventrally_between_sides_of_prosternum;

{47 Proepimeron with_anterior_and_posterior_grooves_smooth with_anterior_groove_minutely_punctate,_posterior_smooth with_both_anterior_and_posterior_grooves_irregular_or_punctate;

{48 Parascutellar_seta present absent;

{49 Scutellum narrower,_W/L_=_0.83-1.86 broader,_W/L_=_2.0-2.5;

{50 Parascutellar_striole longer,_terminated_between_sutural_stria_and_suture_where_parallel short,_terminated_between_sutural_stria_&_suture_where_convergent;

{51 Parascutellar_striole present,_continuous,_smooth_or_punctate present,_consisting_of_3-8_punctures,_not_connected_by_stria present,_consisting_of_1-2_isolated_punctures absent;

{52 Dorsal_elytral_setal_count 0 1 2 3-5;

{53 Accessory_dorsal_setae absent in_fifth_elytral_interval in_fifth_and_seventh_elytral_intervals;

{54 Position_of_anterior_(or_single)_dorsal_elytral_seta at_anterior_1/5-1/3_of_length at_midlength in_posterior_third;

{55 Supracarinal_elytral_seta_(basad_subapical_seta) absent present present_and_doubled;

{56 Elytral_subapical_seta present absent;

{57 Elytral_apical_seta present absent;

{58 Apex_of_elytral_interval_8 with_same_curvature_as_elytral_apex more_convex_than_rest_of_elytra with_distinct_ridge_on_inner_margin distinctly_carinate_on_inner_margin;

{59 Elytral_shape broadly_subquadrate,_sides_subparallel,_humeri_broad subquadrate,_humeri_narrowed ellipsoid_to_ovoid;

{60 Elytral_shape_if_humeri_moderately_broad_(Character_59_state_2) foreshortened,_hemiovoid elongate,_ellipsoid elongate,_ovoid;

{61 Elytral_dorsal_curvature moderately_convex,_sides_sloping_to_margins,_disc_flat convex,_sides_nearly_vertical,_disc_domed very_convex,_sides_nearly_vertical_to_margins,_apex_depressed;

{62 Elytral_basal_groove hardly_recurved recurved distinctly_recurved,_an_angular_hitch_at_humerus;

{63 Elytral_humeral_angle rounded tightly_rounded_to_obtuse-angulate angulate;

{64 Elytral_humeral_angle with_evenly_convex_margin_on_base_and_lateral_edge with_elevated_humeral_tooth_at_angle;

{65 Elytral_striae_on_disc 1-8_present,_complete 1-6_present,_7_obsolete_to_absent 1-5_present,_6-7_reduced_to_obsolete_to_absent 1-3_to_1-4_shallow,_5-7_progressively_obsolete only_sutural_stria_1_present,_punctate,_2-7_obsolete all_reduced,_obsolete_to_absent_except_stria_8;

{66 Elytral_striae_on_apex all_present,_deep 1-7_present,_traceable,_though_they_may_be_shallow_apically 1-3_to_1-5_traceable_on_apex,_7_evident_mesad_subapical_sinuation only_striae_1-2_&_7_visible_near_apex,_3-6_obsolete only_sutural_stria_&_7th_traceable_near_apex,_others_obsolete only_sutural_stria_traceable_near_apex no_striae_visible_at_apex_except_8th_at_subapical_sinuation;

{67 Elytral_apex_along_suture not_upraised_in_a_conjoined_juncture upraised_in_a_conjoined_juncture;

{68 Elytral_strial_punctation absent small,_not_expanding_strial_diameter larger,_elongate_or_round_but_little_expanding_strial_diameter large,_deep,_expanding_strial_diameter;

{69 Setal_depressions_of_dorsal_elytral_setae shallow,_extended_over_1/4_breadth_of_interval_3_or_less evident,_extended_over_1/3-1/2_breadth_of_interval_3 broad,_deep,_extended_over_3/4_breadth_of_interval_3;

{70 Elytral_stria_8 smoothly_impressed_along_midlength serially_punctate,_irregular_along_midlength absent_at_midlength;

{71 Elytral_lateral_marginal_depression very_narrow_throughout_length narrow_to_moderately_broad,_microsculpture_visible_in_deepest_part broad_anteriorly,_moderately_broad_behind;

{72 Subapical_sinuation deep,_distinct,_more_abruptly_curved_anteriorly broad,_shallow;

{73 Mesepisternal_punctures none,_surface_smooth 5-6_small_punctures_in_single_curved_line 5-9_large_punctures_in_2-3_rows 10_or_more_large_punctures_in_3_rows;

{74 Mesosternal/mesepisternal_suture present,_traceable_to_front_margin_of_mesepisternum obsolete_to_absent_anteriorly,_sclerites_fused_near_prothorax;

{75 Metathoracic_flight_wings fully_developed,_venated_with_reflexed_apex brachypterous,_with_reduced_apex,_venation_reduced stenopterous,_reduced_to_a_narrow_strap_longer_than_metanotum vestigial,_wing_rudiment_not_extended_to_apex_of_metanotum;

{76 Metepisternal_width/length_ratio 0.30<x<0.60 0.60<x<0.87 0.87<x<1.46;

{77 Metepisternum-metepimeron_suture distinct,_a_distinct_line incomplete,_reduced_laterally indistinct,_a_depression_but_no_line;

{78 Tarsomeres dorsally_glabrous dorsally_setose;

{79 Metatarsomeres_4 narrow,_with_short_apical_lobes broadly_triangular,_broader_apex_with_very_short_lobes broad_overall,_bilobed,_apical_lobes_broad,_elongate;

{80 Suture_between_ventrites_1_and_2 straight_to_sinuous_with_ventrite_2_not_or_only_slightly_depressed sinuous_with_ventrite_2_distinctly_depressed_inside_curve;

{81 Suture_between_abdominal_ventrites_2_and_3 shallow,_complete,_traceable_to_margin reduced,_incomplete,_absent_laterally;

{82 Abdominal_ventrites_3-5 with_irregular_linear_plaques_in_lateral_reaches with_round,_smooth_depressed_plaques_in_lateral_reaches with_surface_punctate_obscuring_any_other_features;

{83 Apical_abdominal_ventrite_6_(male) with_1_seta_each_side_(total_of_2) with_2_setae_each_side_(total_of_4) with_3_setae_each_side_(total_of_6) with_4_setae_each_side_(total_of_8);

{84 Apical_abdominal_ventrite_(female) with_2_setae_each_side_(total_of_4) with_3_setae_each_side_(total_of_6) with_4_setae_each_side_(total_of_8);

{85 Apical_abdominal_ventrite_6_(female) glabrous_medially_between_apical_setae with_setose_patch_of_4-5_setae_medially with_pair_of_subapical_setae_medially;

{86 Microsculpture_on_frons granulate_isodiametric_sculpticells evident_to_shallow_isodiametric_mesh isodiametric_to_transverse_mesh_in_transverse_rows indistinct_transverse_mesh_or_lines absent,_surface_glossy;

{87 Microsculpture_of_pronotal_disc isodiametric_in_transverse_rows_mixed_with_transverse_mesh,_2-3x transverse_mesh,_sculpticells_3-4x_broad_as_long mix_of_transverse_mesh_and_transverse_lines reduced,_surface_glossy,_with_indistinct_transverse_mesh_or_lines;

{88 Microsculpture_of_pronotal_base isodiametric_between_basal_punctures transversely_stretched_isodiametric_between_punctures evident_transverse_mesh,_sculpticells_2-3x_broad_as_long indistinct,_elongate_transverse_mesh_or_unconnected_lines;

{89 Microsculpture_of_elytral_disc a_mix_of_distinct_isodiametric_and_transverse_sculpticells a_regular_transverse_mesh,_sculpticell_breadth_2-3x_length a_mix_of_transverse_mesh_3-4x,_and_transverse_lines reduced,_surface_glossy,_indistinct_mesh_plus_lines_over_part;

{90 Microsculpture_on_abdominal_lateral_base swirling_isodiametric_and_transverse_sculpticells reduced,_surface_glossy_with_indistinct_sculpticells;

{91 Body_coloration dark,_elytral_margins_concolorous_or_indistinctly,_narrowly__paler ferruginous,_elytra_bicolored_with_outer_4-5_intervals_much_paler ferruginous,_elytra_bicolored,_outer_3-4_intervals,_apex_much_paler;

{92 Antecostal_margin_of_male_tergite_9_(ring_sclerite) angulate broadly_rounded;

{93 Distal_terminus_of_male_tergite_9_antecostal_margin not_extended extended,_the_distal_angle_with_an_elongate_extension;

{94 Aedeagal_ventral_(right,_except_M._storeyi)_paramere_shape elongate,_paddle-like,_apex_broadly_subparallel_to_rounded_tip quadrate-conchoid,_dorsal_and_ventral_margins_subparallel_to_apex elongate-conchoid,_apex_narrowed_so_shape_is_subtriangular very_elongate,_moderately_narrow,_paramere_>0.85_lobe_gape very_elongate,_apical_half_narrowed_to_whiplike_extension;

{95 Aedeagal_ventral_(right,_except_M._storeyi)_paramere densely_setose_on_apicoventral_margin,_apical_setae_not_present densely_setose_on_apicoventral_margin,_apical_setae_not_different with_8-21_setae_on_ventral_margin,_apical_setae_distinct with_2-7_setae_on_ventral_margin_well_separated_from_apical_setae glabrous_(or_a_single_seta)_on_ventral_margin_plus_2_apical_setae;

{96 Aedeagal_ventral_(right,_except_M._storeyi)_paramere with_dorsal_surface_glabrous_or_with_single_subapical_seta_ with_dorsal_surface_setose_(4-18_setae_present_in_apical_half);

{97 Aedeagal_dorsal_(left,_except_M._storeyi)_paramere_shape broad_basally,_apical_half_elongate,_margins_subparallel broad_basally,_apex_short,_narrowly_rounded,_subangulate broadly_quadrate_basally,_apical_extension_narrowly_attenuate narrower_basally,_evenly_narrowed_to_whip-shaped_apex;

{98 Aedeagal_dorsal_(left,_except_M._storeyi)_paramere glabrous_apically,_setae_may_be_present_subapically 2-4_very_short_setae_at_apex 2-4_(or_1)_longer_setae_at_apex 2-4_longer_apical_setae_plus_4_additional_shorter_subapical_setae;

{99 Aedeagal_median_lobe_ostial_opening without_ventroapical_operculum with_hinged_ventroapical_opercular_flap;

{100 Aedeagal_internal_sac unilobed,_short_to_long bilobed,_with_distinct_dorsal_and_apical_lobes;

{101 Aedeagal_internal_sac with_flagellum_associated_with_gonopore with_circular_flagellar_plate_associated_with_gonopore without_flagellum,_only_dorsal_plate_present;

{102 Short_to_elongate_flagellar_configuration_(state_0_of_#101) thin,_lightly_sclerotized,_may_be_short,_sinuous,_or_long_and_whiplike broad,_porrect,_spikelike cresent-shaped_remnant_of_flagellar_sheath_base;

{103 Apical_flagellar_plate_(state_1_of_#101) donut-like_roll_lightly_sclerotized_or_spiculated,_gonopore_within well-sclerotized_and_ridged_plate,_gonopore_on_convex_side;

{104 Aedeagal_sac_dorsal_plate absent,_flagellum_and_flagellar_sheath_only present_in_addition_to_or_instead_of_flagellum_and_flagellar_sheath;

{105 Aedeagal_sac_dorsal_plate_(state_1_#104) translucent,_covered_with_microspicules well_sclerotized,_smooth;

{106 Aedeagal_internal_sac_surface_dorsad_position_of_dorsal_plate unarmored with_patch_of_robust_macrospicules;

{107 Aedeagal_internal_sac_ventral_sclerite_patch absent,_area_basad_flagellum_and_sheath_unsclerotized present_as_distinct_sclerite_basad_flagellum_and_sheath;

{108 Aedeagal_internal_sac_ventrobasal_spicular_sclerite absent present;

{109 Aedegal_median_lobe_shaft gracile,_aedeagus_relatively_narrow_dorsoventrally,_parallel-sided broad,_aedeagus_robust,_broadest_at_midlength;

{110 Aedeagal_median_lobe_tip extended_narrowly_beyond_ostium narrow,_not_extended_beyond_ostium broadly_expanded_dorsoventrally,_extended_beyond_ostium broadly_expanded_dorsoventrally,_not_extended_beyond_ostium;

{111 Broad_extension_of_aedeagal_median_lobe_(states_2,_3_#110) parallel-sided_dorsoventrally_to_rounded_tip convexly_spoon_shaped,_expanded_both_dorsally_and_ventrally downturned,_tip_at_angle_to_shaft,_apical_face_straight apex_expanded_dorsally_&_ventrally,_adze-shaped broadly_downturned_in_fishhook_configuration,_tip_pointed;

{112 Aedeagal_median_lobe_apical_margin smoothly_convex_to_acuminate with_hitch_to_distinct_invagination_along_margin with_distinct_invagination_along_margin;

{113 Aedeagal_median_lobe_apex smoothly_extended_past_ostial_opening with_dorsoventral_crease_distad_ostial_opening;

{114 Female_bursa_copulatrix_shape elongate,_columnar,_length/width_>2.0-3.25 short_and_columnar,_length/width_1.0-2.0;

{115 Female_bursa_copulatrix_surface membranous,_not_wrinkled,_transparent thin,_surface_wrinkled_and_translucent thick,_surface_wrinkled_and_not_transparent;

{116 Female_bursal_copulatrix_apicoventral_surface membranous_as_remainder_of_bursa sclerotized_into_plate-like_structure;

{117 Female_bursa_copulatrix_ of_approximately_equal_diameter_throughout_length with_smaller_apical_portion,_diameter_much_less_than_basal_part;

{118 Spermathecal_duct_placement on_bursa_near_common_oviduct/bursa_juncture apically_on_bursa_copulatrix_main_lobe dorsoapically_on_bursa_copulatrix_main_lobe basodorsally_on_bursa_dorsad_common_oviduct/bursa_juncture;

{119 Spermathecal_duct_placement_near_common_oviduct_(state_0,_#118) on_right_side_of_bursa_laterad_common_oviduct on_ventral_side_of_bursa_distad_common_oviduct;

{120 Female_bursa_copulatrix_configuration unipartite,_without_dorsal_lobe bipartite,_spermathecal_duct_entering_smaller_dorsal_lobe_apex bipartite,_spermathecal_duct_entering_dorsal_lobe_equal_to_ventral;

{121 Helminthoid_sclerite elongate_sclerotized_apodeme rounded_projection two_parallel_apodemes absent;

{122 Ligular_apophysis_on_common_oviduct absent present;

{123 Spermathecal_duct present,_spermatheca_stalked absent,_spermatheca_appressed;

{124 Spermathecal_duct_(state_0_of_#123) subequal_to_spermathecal_length 1.25-3.0x_spermathecal_length;

{125 Spermathecal_shape fusiform_or_ovoid_bulb_on_narrow_duct filiform_reservoir_on_equal-sized_duct appressed_bulb;

{126 Spermathecal_gland_duct entering_on_spermathecal_duct_at_spermathecal_base entering_on_spermathecal_reservoir;

{127 Ramus_(gonocoxite_VIII_of_Deuve_1993) present_as_defined_membranous_fold present,_heavily_sclerotized;

{128 Lateroapical_fringe_of_setae_on_gonocoxite_1 composed_of_single_seta composed_of_2_setae composed_of_2-5_setae_(at_least_3_setae_unilaterally);

{129 Medial_setae_of_gonocoxite_1 absent_along_entire_mesal_margin_(or_only_1-2_small_setae_apically) absent_at_apex_but_several_subapically_along_margin large_seta_at_apical_angle_plus_other_setae_along_mesal_margin;

{130 Mediobasal_surface_of_gonocoxite_1 smooth extensively_shagreened_with_overlapping_scales_or_setae;

{131 Apical_gonocoxite_2 broadly_subtriangular,_apex_rounded,_mitten-shaped narrowly_subtriangular,_basal_width_<_0.4x_length more_broadly_subtriangular,_basal_width_about_half_length with_lateral_apodeme_basally,_basal_width_0.6-0.7x_length falciform,_basolateral_apodeme,_basal_width_>0.75_length;

{132 Lateral_ensiform_setae_of_apical_gonocoxite_2 1 2-3_(at_least_2_unilaterally) 3-5_(3_or_more_both_sides);

{133 Lateral_ensiform_setae_of_apical_gonocoxite_2 shorter,_basal_seta_0.25-0.40x_gonocoxite_length longer,_basal_seta_0.40-0.50x_gonocoxite_length;

{134 Lateral_ensiform_setae_of_gonocoxite_2 on_lateral_margin_of_gonocoxite on_ventral_surface_of_gonocoxite;

{135 Apical_nematiform_setae_of_gonocoxite_2 in_fossa_1/4-1/5_from_apex in_fossa_1/2-1/4_from_apex;

{136 Mesal_surface_of_laterotergite_IX setose spiculose;

;

tread 'wha' (0(((((((46(((64(((((62(61 63))(55((56(54 57))(51 60))))(58 59))((52 53)(48 50)))(45 49)))(42 47))(43 44)))(41(39 40)))((30(28 29))(27((36(31(33(26 37))))(32(34(35(38(24 25)))))))))(20((22 23)(19 21))))(18(17(15 16))))((8(13 14))(7((10 11)(9 12)))))(6(5(3(4(1 2))))))) * (0(((((((46(((64(((((62(61 63))(55((56(54 57))(51 60))))(58 59))((52 53)(48 50)))(45 49)))(42 47))(43 44)))(41(39 40)))((30(28 29))(27((36(31(33(26 37))))(32(34(35(38(24 25)))))))))(20(19(21(22 23)))))(18(17(15 16))))((8(13 14))(7((10 11)(9 12)))))(6(5(3(4(1 2))))))) * (0(((((((46(((64(((((62(61 63))(55((56(54 57))(51 60))))(58 59))((52 53)(48 50)))(45 49)))(42 47))(43 44)))(41(39 40)))((30(28 29))(27((36(31(33(26 37))))(32(34(35(38(24 25)))))))))(20(22(23(19 21)))))(18(17(15 16))))((8(13 14))(7((10 11)(9 12)))))(6(5(3(4(1 2))))))) * (0(((((((46(((64(((((62(61 63))(55((56(54 57))(51 60))))(58 59))((52 53)(48 50)))(45 49)))(42 47))(43 44)))(41(39 40)))((30(28 29))(27(32((36(31(33(26 37))))(34(35(38(24 25)))))))))(20(22(23(19 21)))))(18(17(15 16))))((8(13 14))(7((10 11)(9 12)))))(6(5(3(4(1 2))))))) * (0(((((((46(((64(((((62(61 63))(55((56(54 57))(51 60))))(58 59))((52 53)(48 50)))(45 49)))(42 47))(43 44)))(41(39 40)))((30(28 29))(27(32((36(31(33(26 37))))(34(35(38(24 25)))))))))(20((22 23)(19 21))))(18(17(15 16))))((8(13 14))(7((10 11)(9 12)))))(6(5(3(4(1 2))))))) * (0(((((((46(((64(((((62(61 63))(55((56(54 57))(51 60))))(58 59))((52 53)(48 50)))(45 49)))(42 47))(43 44)))(41(39 40)))((30(28 29))(27(32((36(31(33(26 37))))(34(35(38(24 25)))))))))(20(19(21(22 23)))))(18(17(15 16))))((8(13 14))(7((10 11)(9 12)))))(6(5(3(4(1 2))))))) * (0(((((((46(((64(((((62(61 63))(55((56(54 57))(51 60))))(58 59))((52 53)(48 50)))(45 49)))(42 47))(43 44)))(41(39 40)))((30(28 29))(27((36(31(33(26 37))))(32(34(35(38(24 25)))))))))(20(21(19(22 23)))))(18(17(15 16))))((8(13 14))(7((10 11)(9 12)))))(6(5(3(4(1 2))))))) * (0(((((((46(((64(((((62(61 63))(55((56(54 57))(51 60))))(58 59))((52 53)(48 50)))(45 49)))(42 47))(43 44)))(41(39 40)))((30(28 29))(27(32((36(31(33(26 37))))(34(35(38(24 25)))))))))(20(21(19(22 23)))))(18(17(15 16))))((8(13 14))(7((10 11)(9 12)))))(6(5(3(4(1 2))))))) * (0(((((((46(((64(((((62(61 63))(55((56(54 57))(51 60))))(58 59))((52 53)(48 50)))(45 49)))(42 47))(43 44)))(41(39 40)))((30(28 29))(27(32(36(31(33(26 37))))(34(35(38(24 25))))))))(20(19 21 22 23)))(18(17(15 16))))((8(13 14))(7((10 11)(9 12)))))(6(5(3(4(1 2)))))))

;
